# Supplementary material
Source: HighWire-hosted journal article supplement (https://bmjopen.bmj.com/content/9/3/e025956)
Supplement: inline-supplementary-material-1 [file inline-supplementary-material-1.pdf]

## **SUPPLEMENTARY MATERIAL**

### **APPENDIX 1**

#### **Focus group discussion guide/indicative discussion topics**

##### *Perceptions and experiences working with migrants in healthcare more broadly*

- What do you consider to be the key issues for migrants in relation to health and health care? [challenges, benefits]
- Can you talk about the issues you work with specifically for newly arrived migrants, and more established migrants/migrant groups?
- What are your experiences of how pre-migration and migration experiences affect the way that people access services?
- Can you discuss your experiences of the ways migrants negotiate between traditional and Western medical systems? [benefits, challenges]
- In your experience, how do migrants access information on services and how do they improve their knowledge?

##### *Working with migrants with cancer and their families*

- What are the key issues for health professionals working with migrant patients and their families in cancer care?
- In your work, what are the key issues for migrant patients and their families in relation to cancer care? [cancer specific issues?]
- In your experience, how do migrants with cancer negotiate between informal (family) and formal (service) caring systems?
- Can you discuss your experiences of working with patients and families who may understand illness (and cancer specifically) in varying ways? [other services/supports?]
- What ideas do people you work with have about the role of family and caring for someone with cancer?
- Can you discuss your experiences of some of the approaches taken by migrants with cancer to managing their own health?
  - Under what circumstances would they access traditional healers?
  - Under what circumstances would they access western medicine?
- In your experience, how do migrants access information on cancer services specifically, and how do they improve their knowledge of cancer care services?
- How can services be better delivered to be more culturally responsive to people from diverse backgrounds who have been diagnosed with cancer?
